# Supplementary material for: Dissecting dual roles of MyoD during lineage conversion to mature myocytes and myogenic stem cells
Source: PubMed Central journal article supplement — Genes Dev. 2021 Sep 1;35(17-18):1209–28. doi: 10.1101/gad.348678.121 (PMC8415322; doi:10.1101/gad.348678.121), 2021-09-01

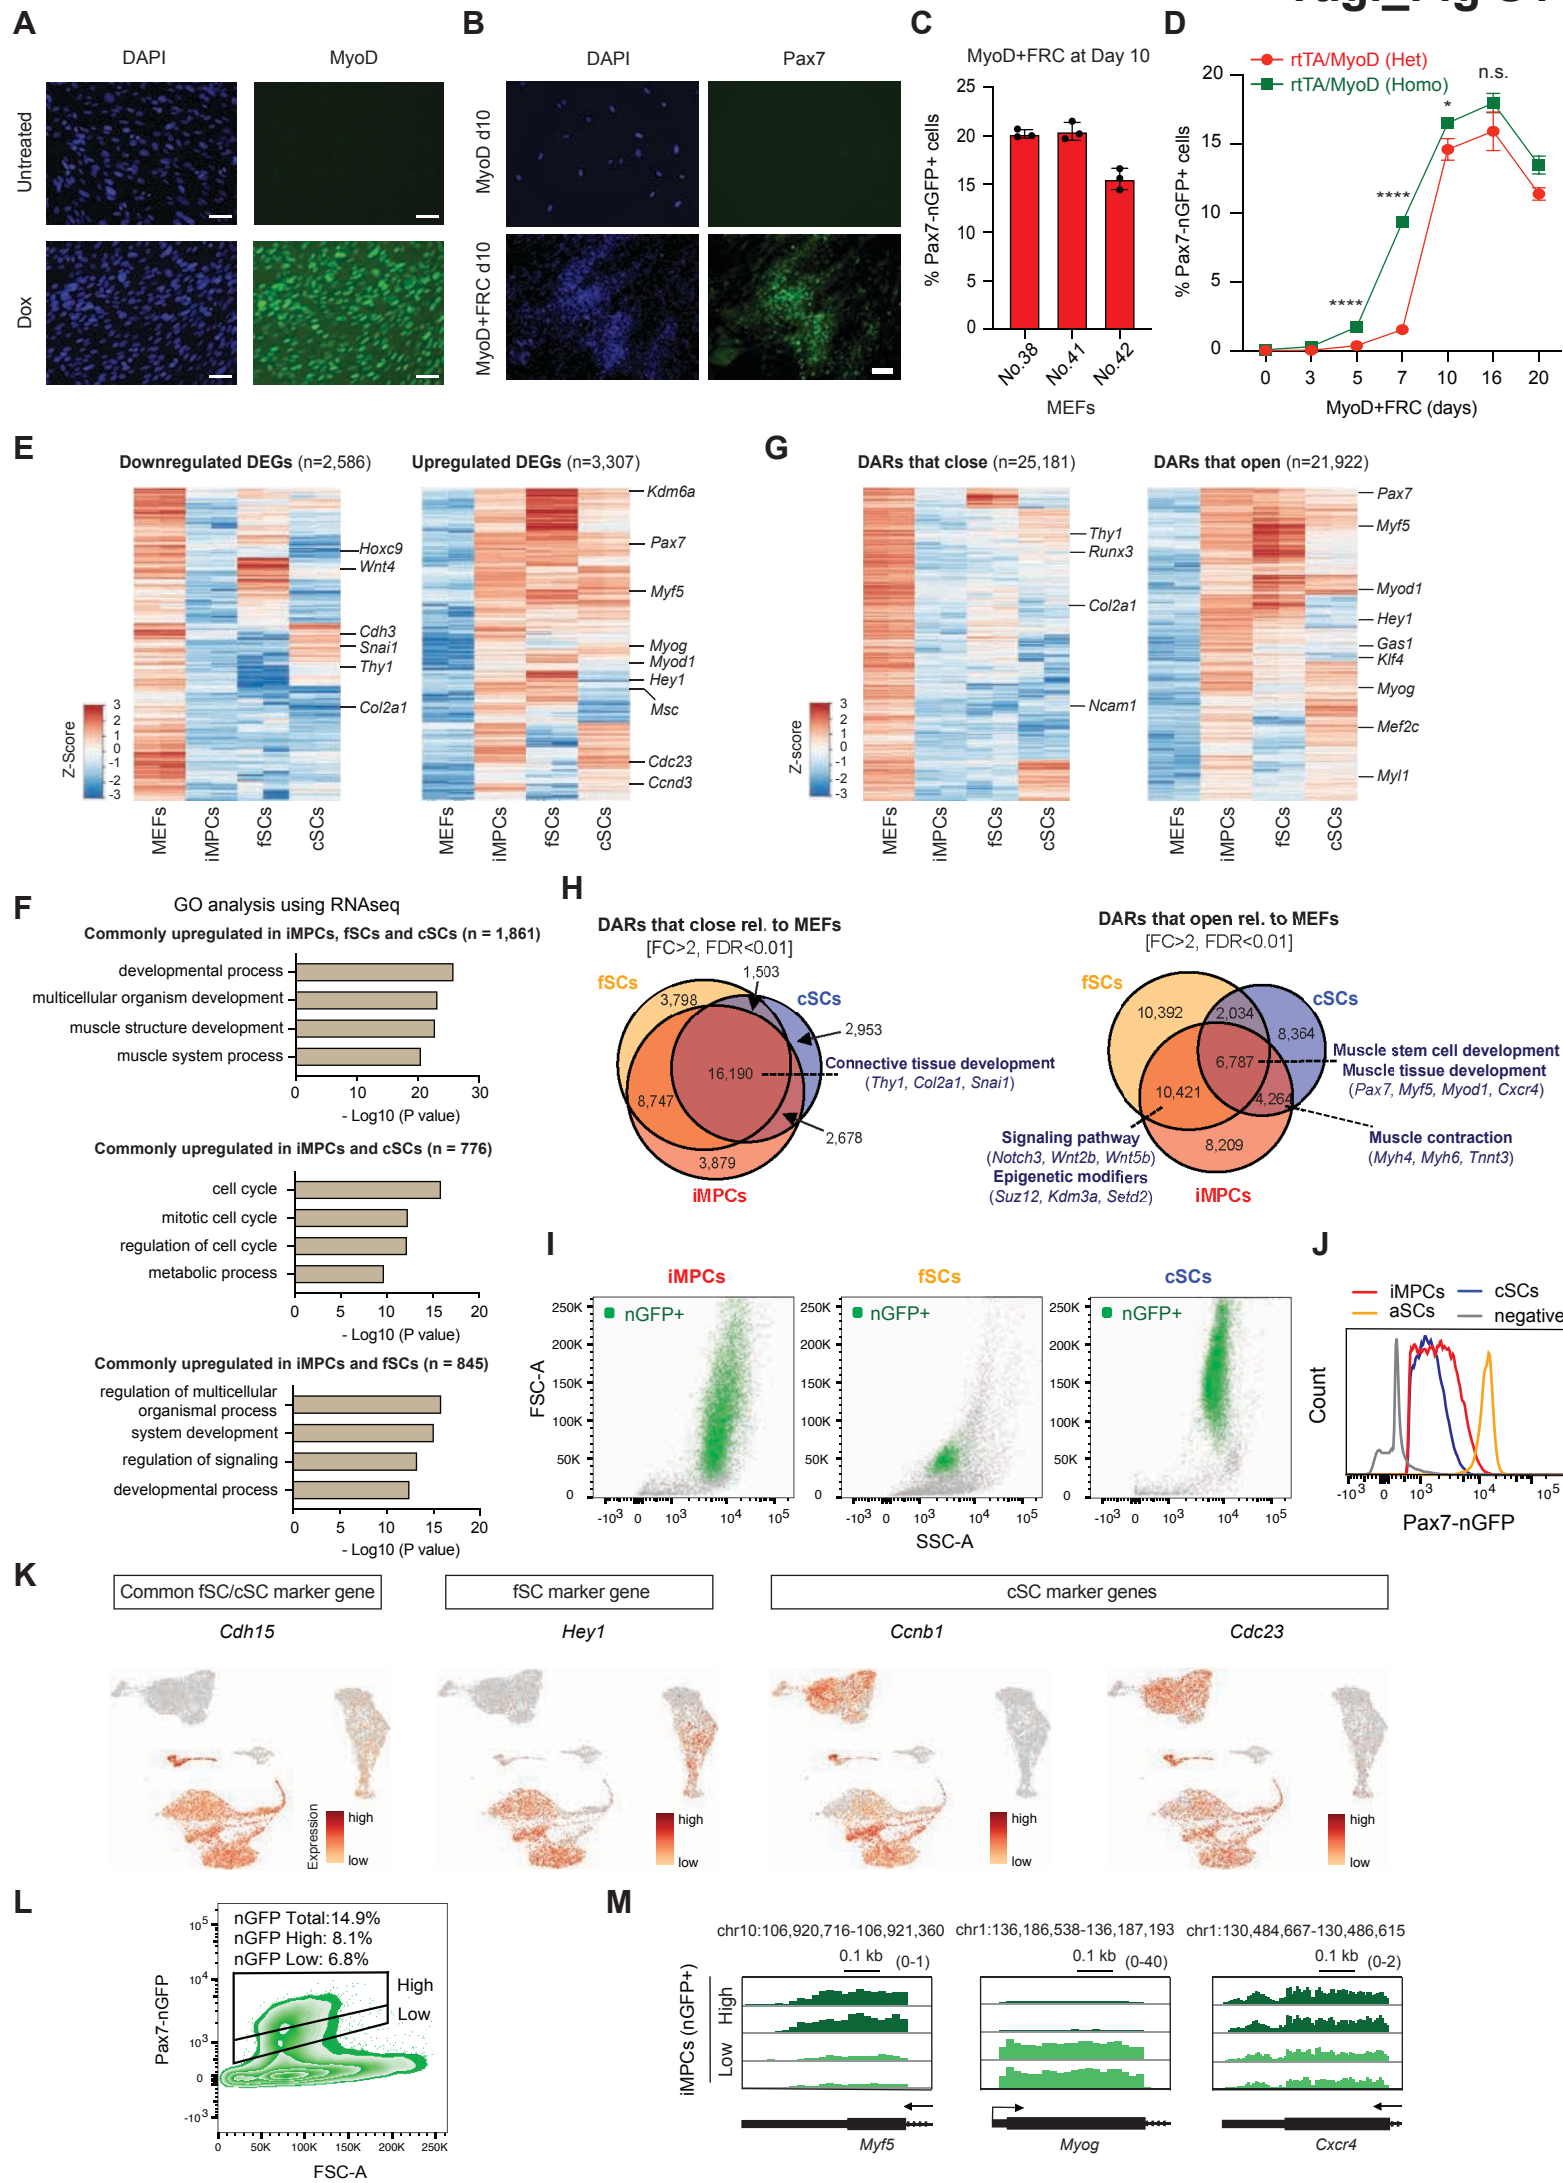

A

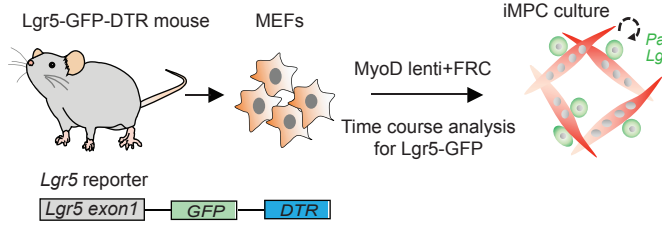

B

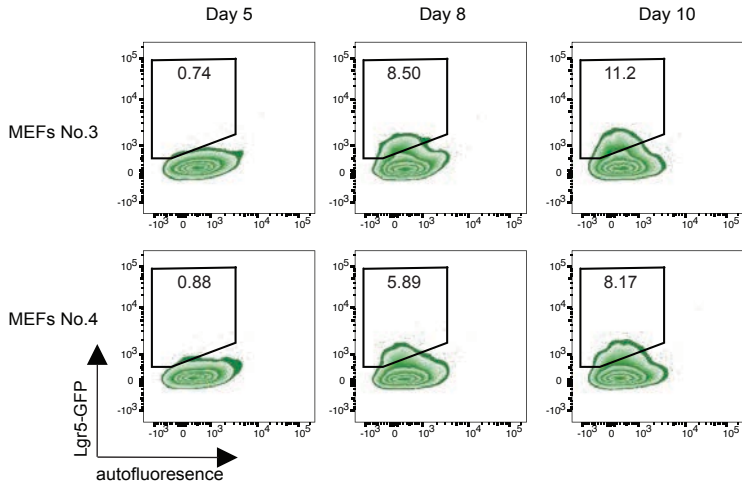

D

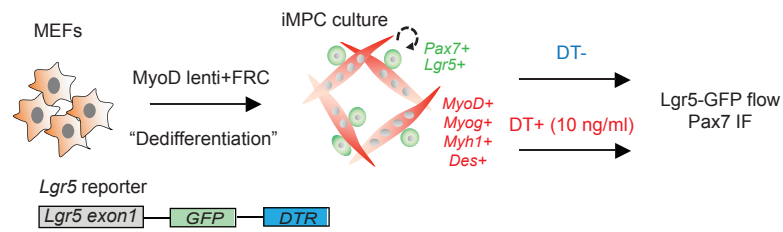

E

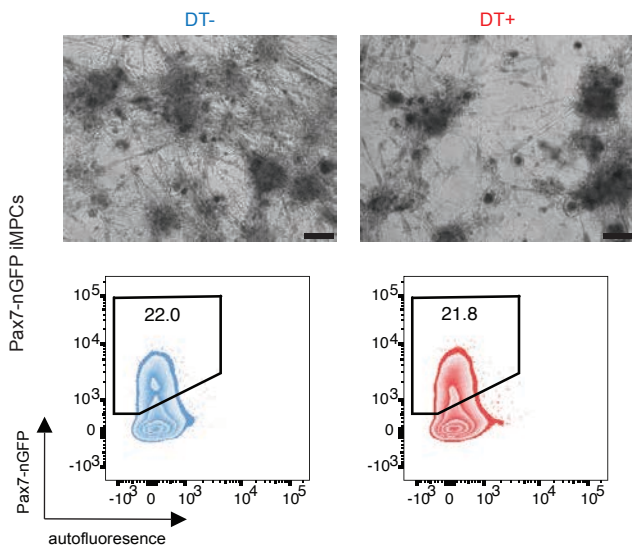

C

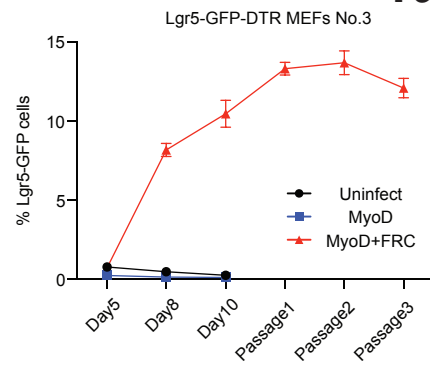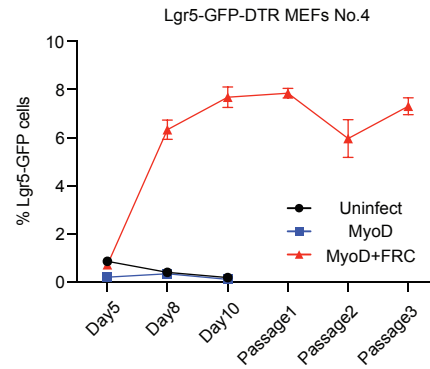

F

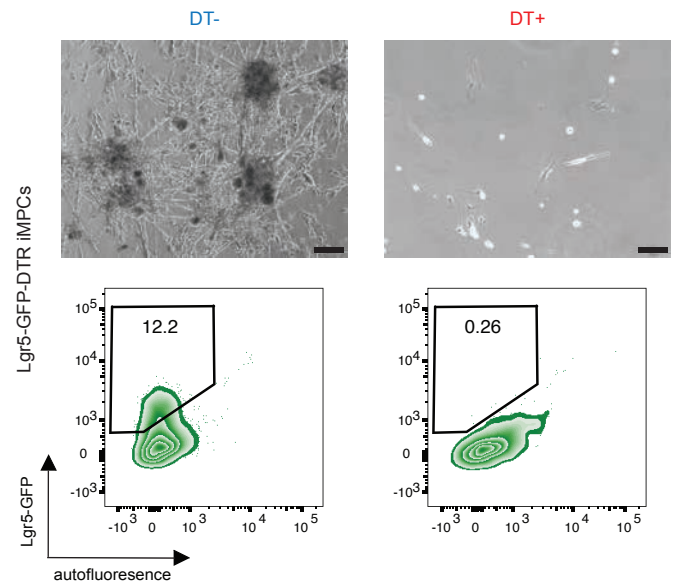

G

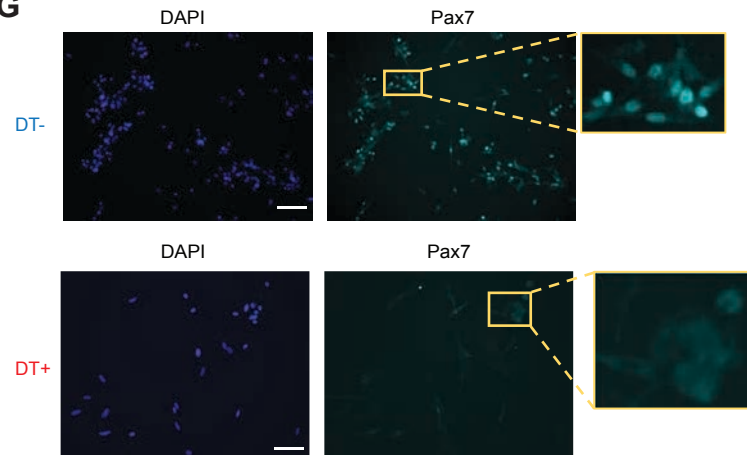

**A**

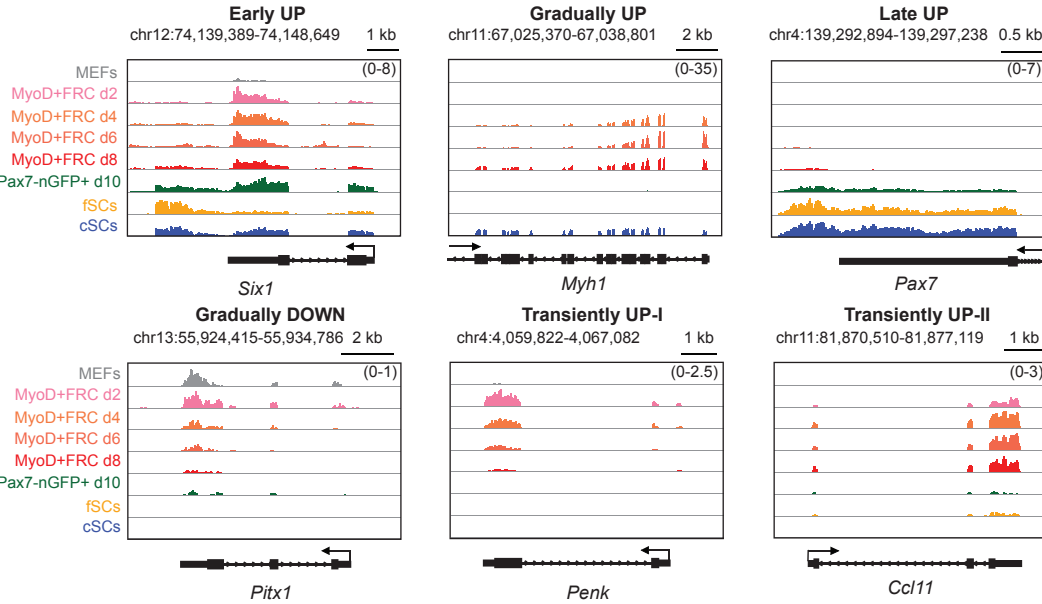

**B**

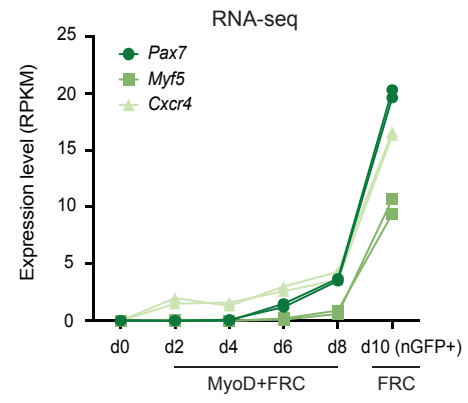

**C**

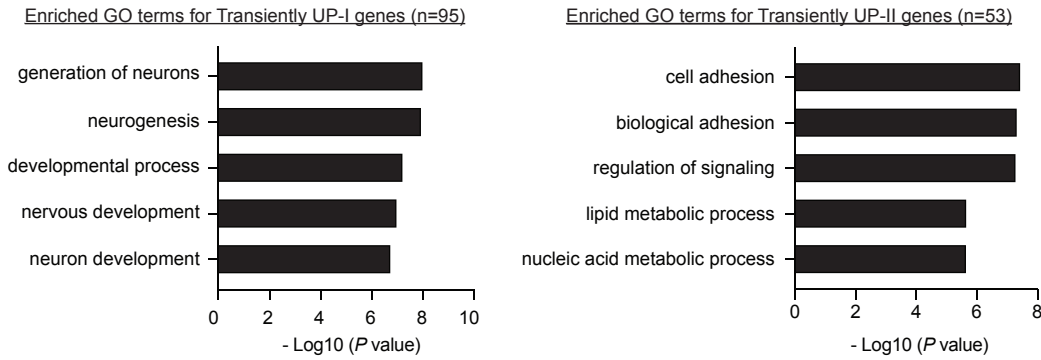

**D**

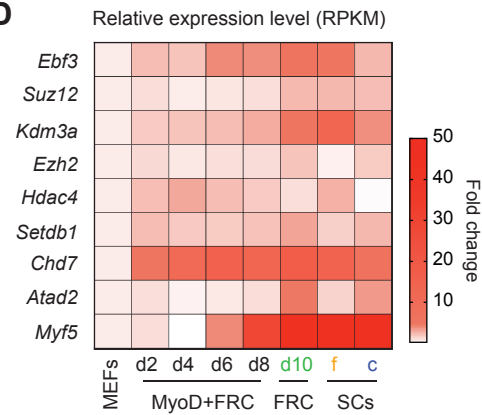

**E**

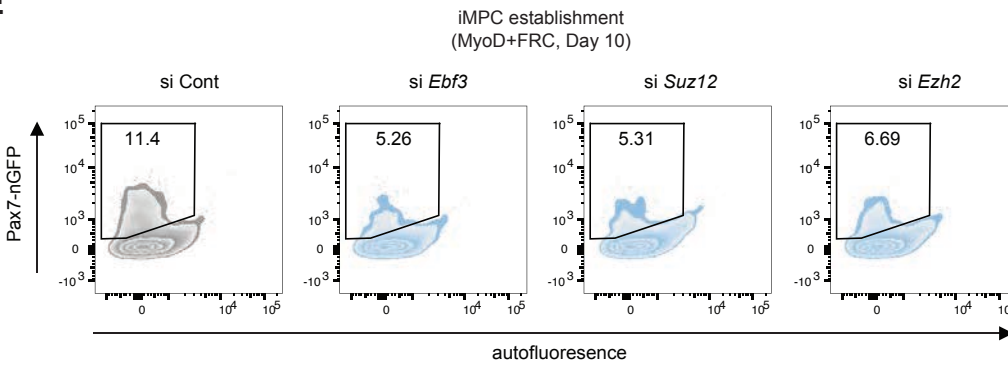

**F**

ChIP-seq Enrichment Analysis (ChEA) for downregulated genes in Pax7-nGFP+ iMPCs d10 (n=2,191)

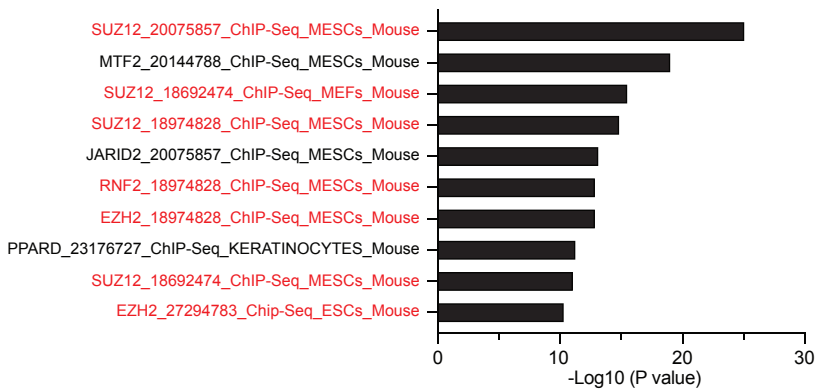

**A**

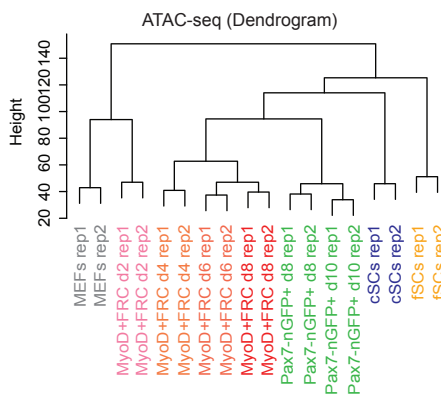

**B**

DARs that close (Pax7-nGFP+ d10 vs MEFs)  
n=35,022  
Enriched GO terms  
Epithelium development 2.00E-21  
Cell adhesion 3.83E-20  
Embryo development 1.95E-16  
Epithelial tube development 2.65E-10  
Epithelial cell proliferation 5.84E-09  
(Examples) *Thy1, Col2a1, Cdh2, Snai1, Snai2, Ncam1, Zeb2, Col3a1*

DARs that open (Pax7-nGFP+ d10 vs MEFs)  
n=34,502  
Enriched GO terms  
Tissue morphogenesis 1.82E-13  
Muscle structure development 9.47E-13  
Embryonic morphogenesis 1.87E-11  
Muscle tissue development 6.12E-10  
Muscle cell differentiation 1.59E-08  
(Examples) *Myod1, Myog, Myf5, Pax7, Notch3, Six1, Tcf12, Des*

**C**

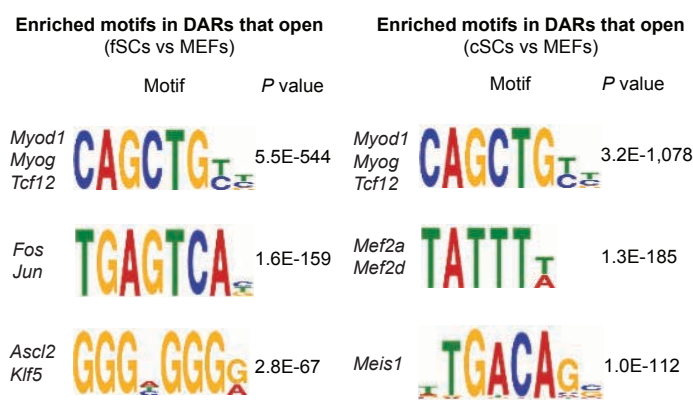

**D**

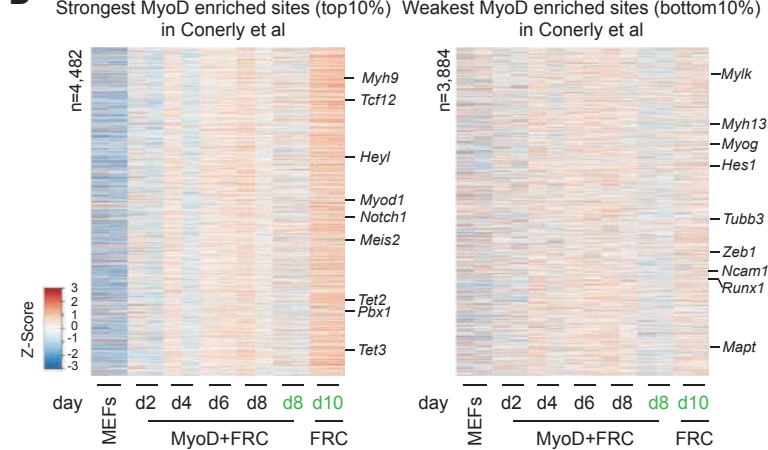

**E**

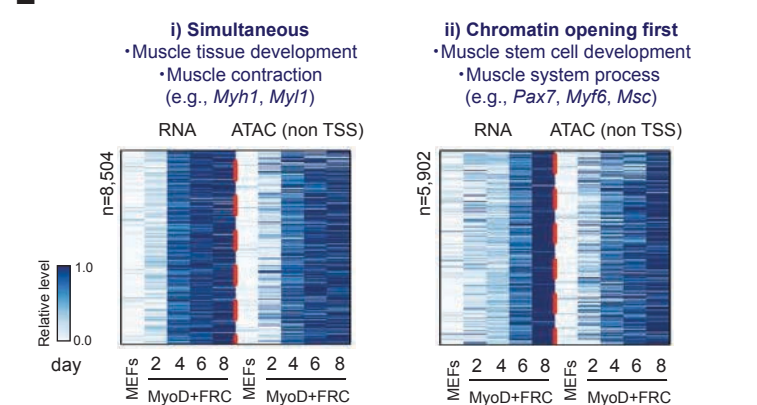

**F**

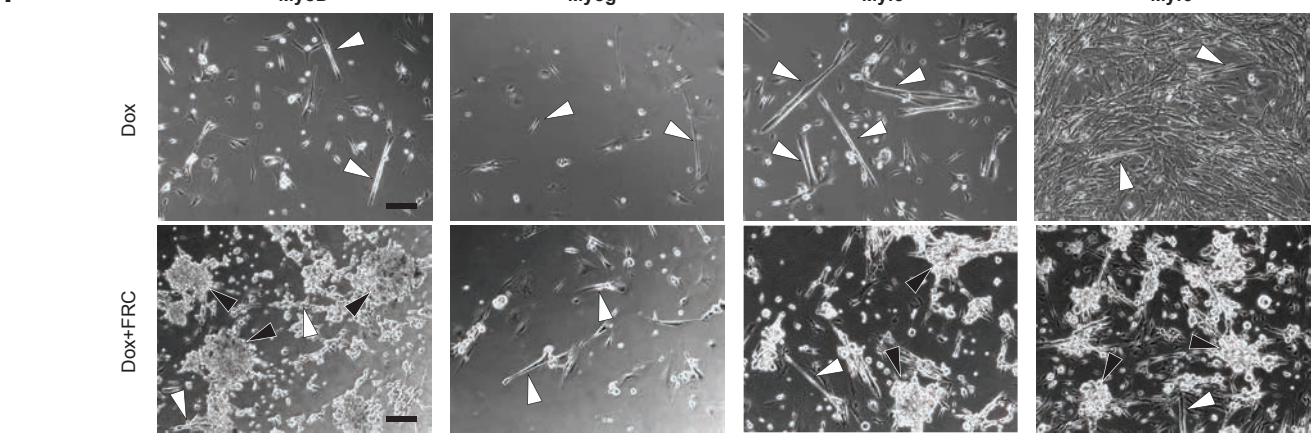

**G**

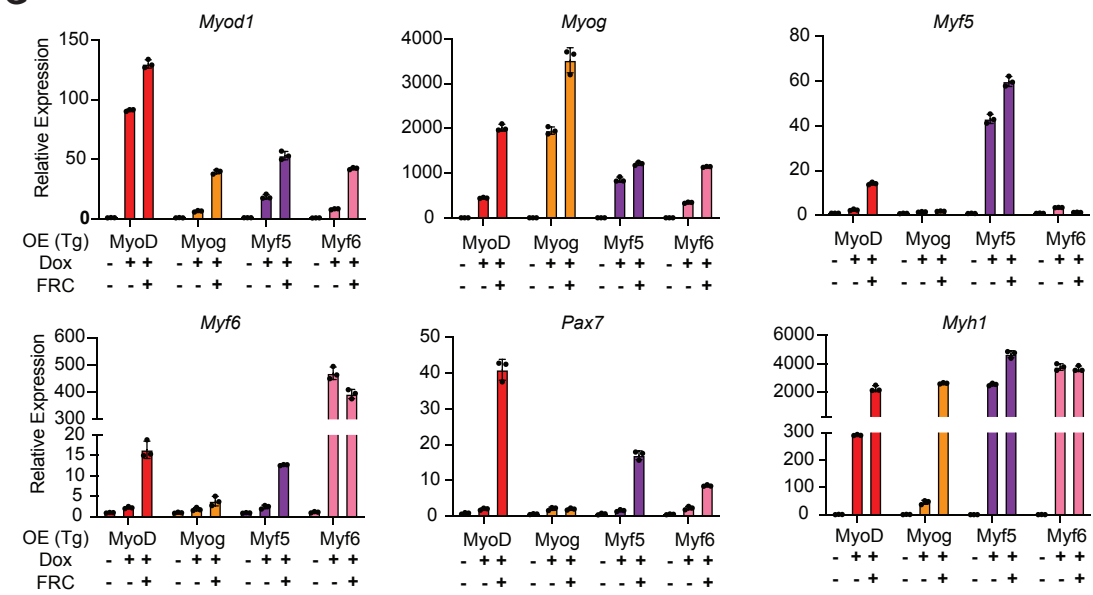

**H**

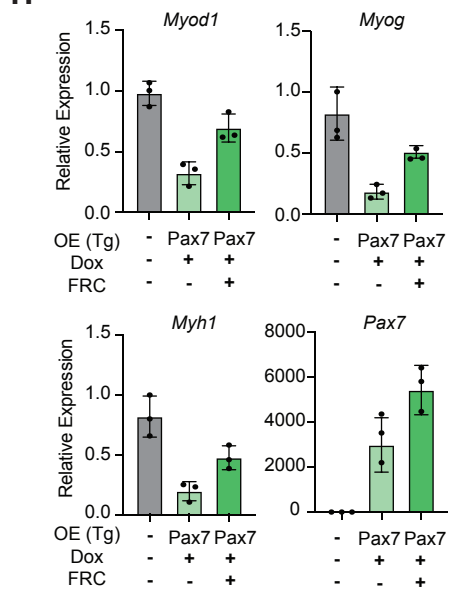

**A**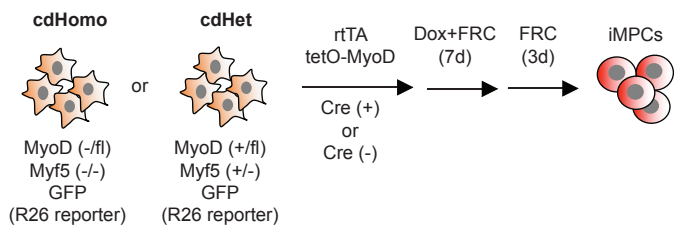**B**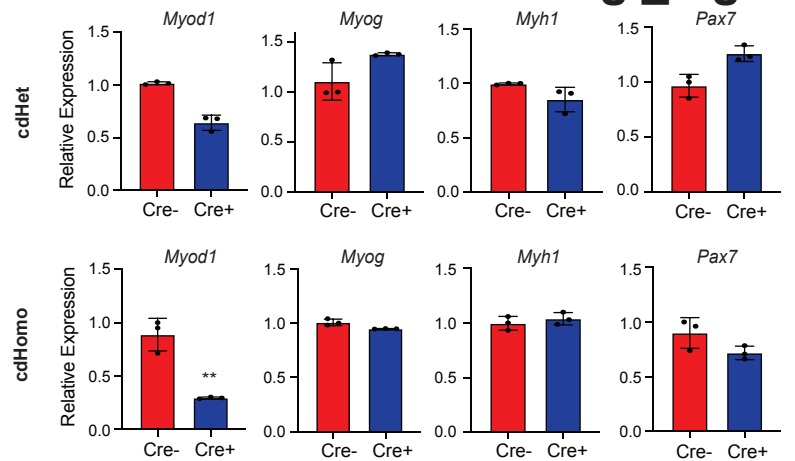**C**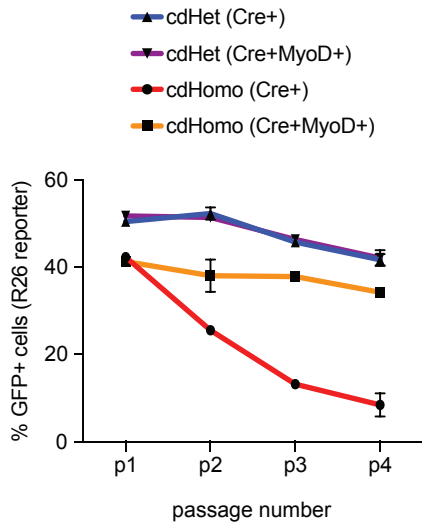**D**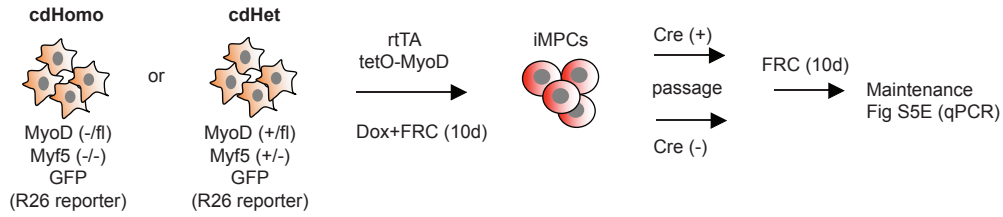**E**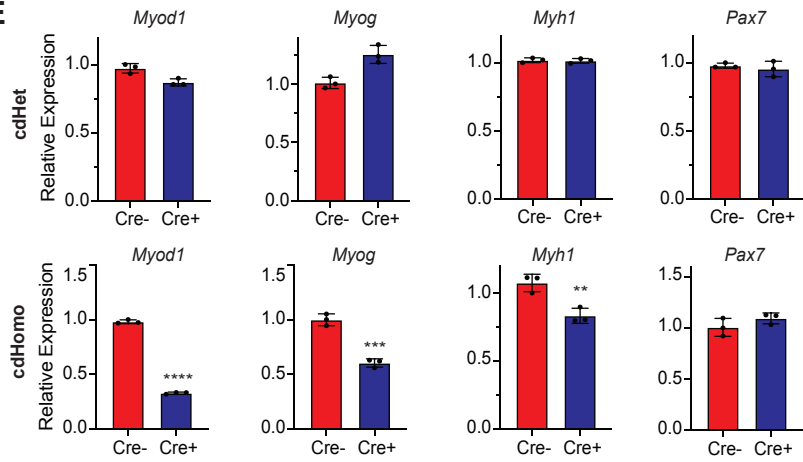**F**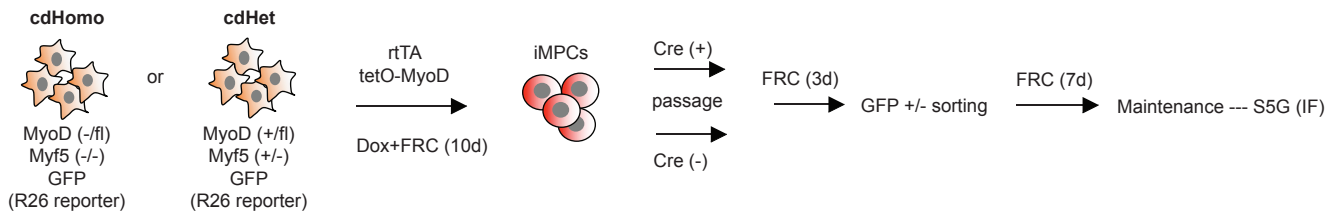**G**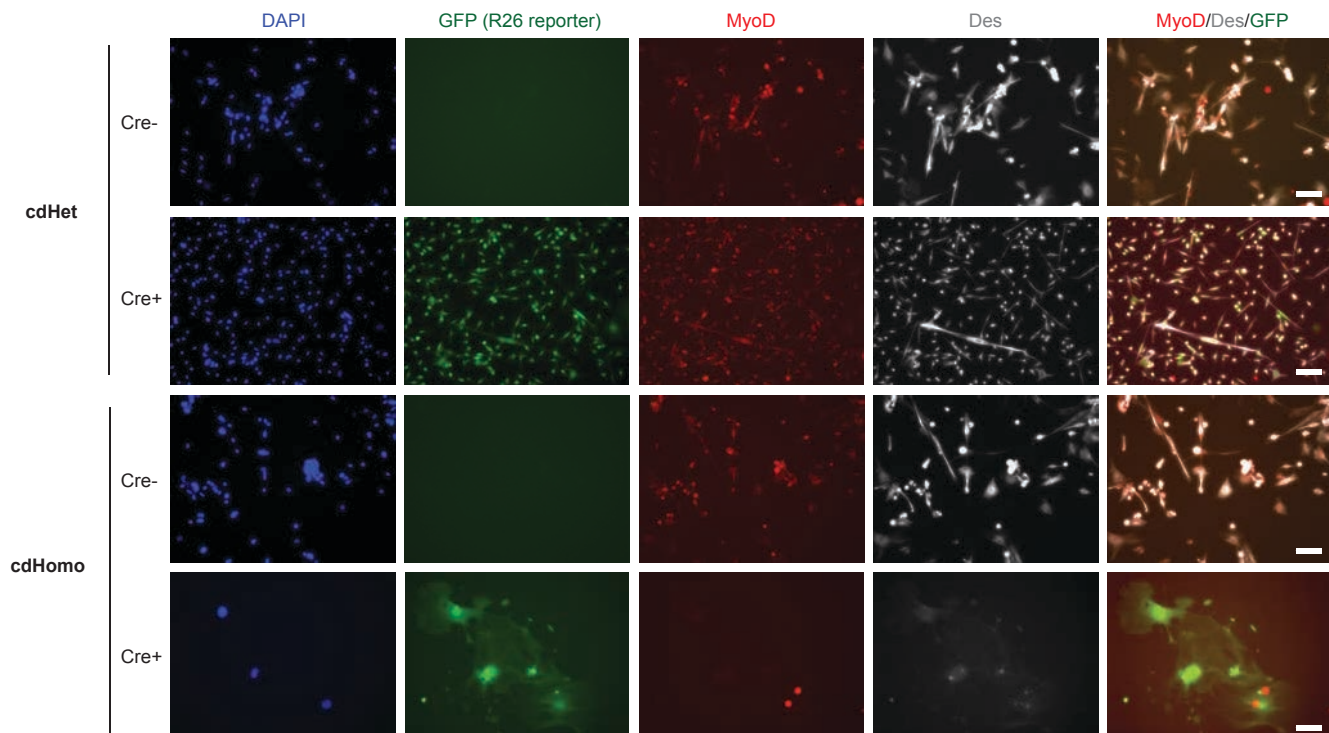

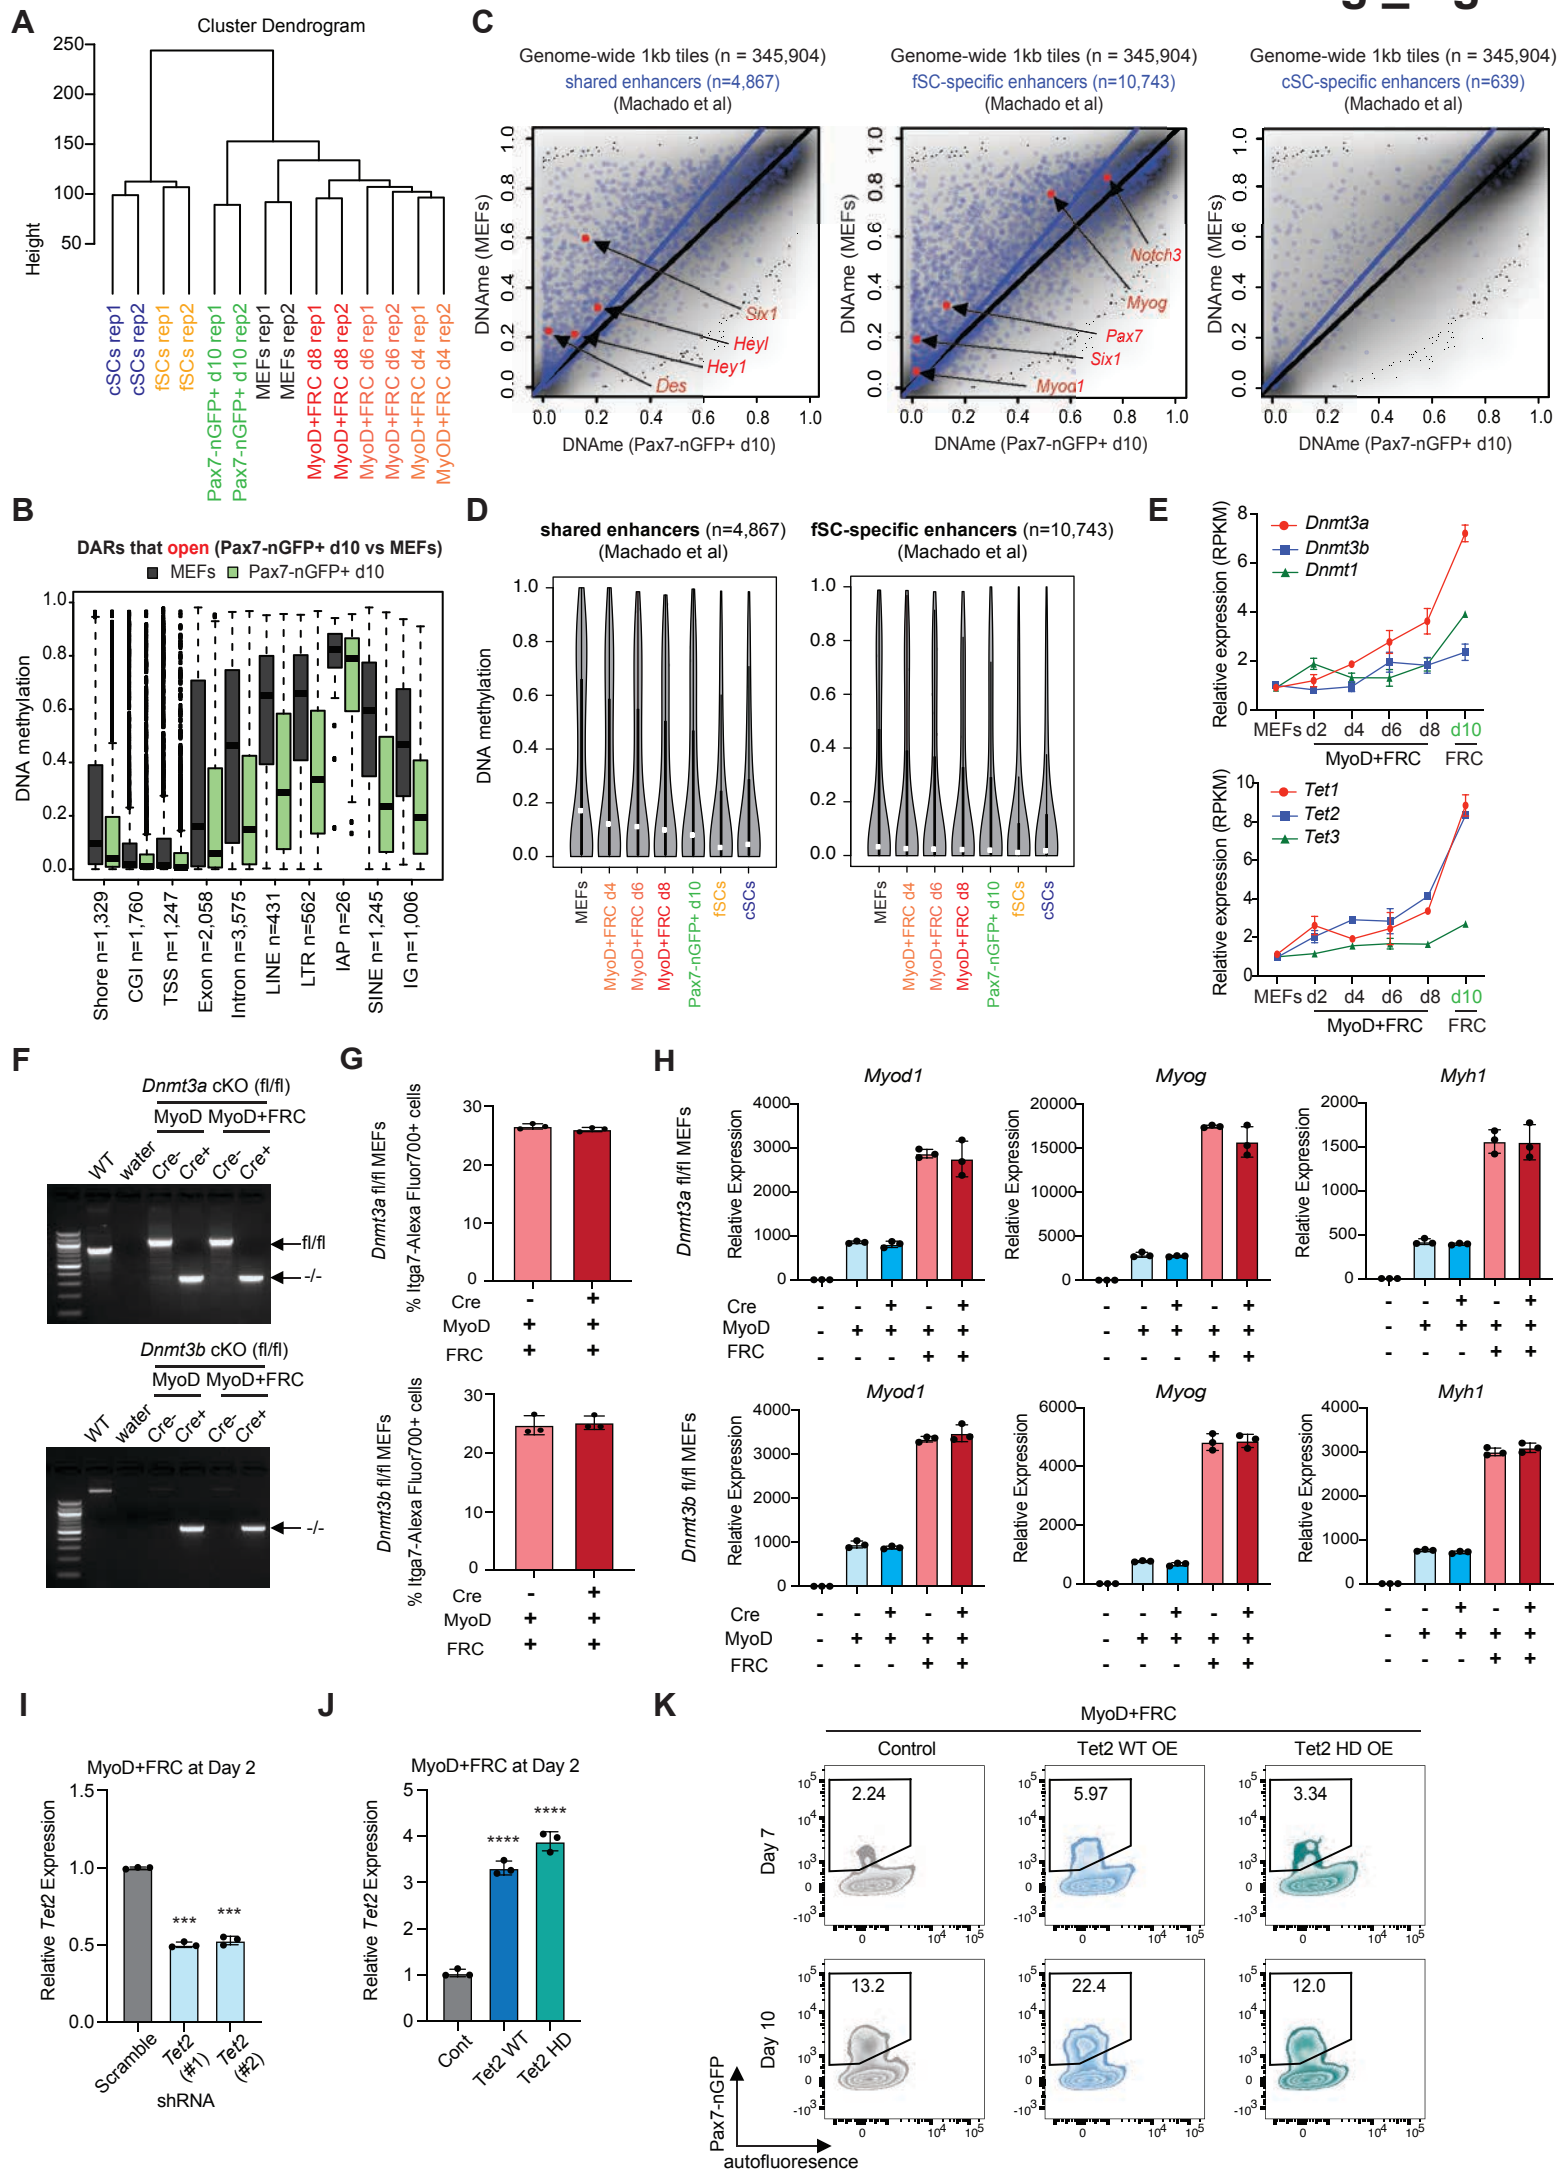

**A**

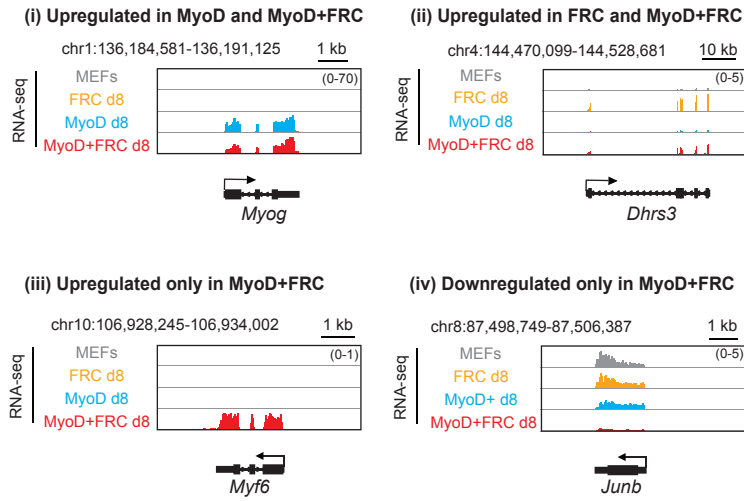

**B**

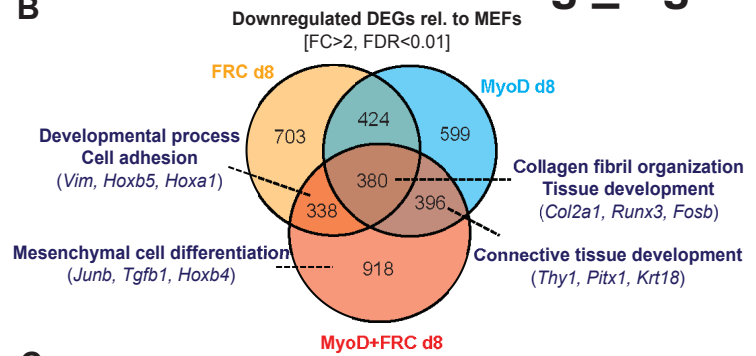

**C**

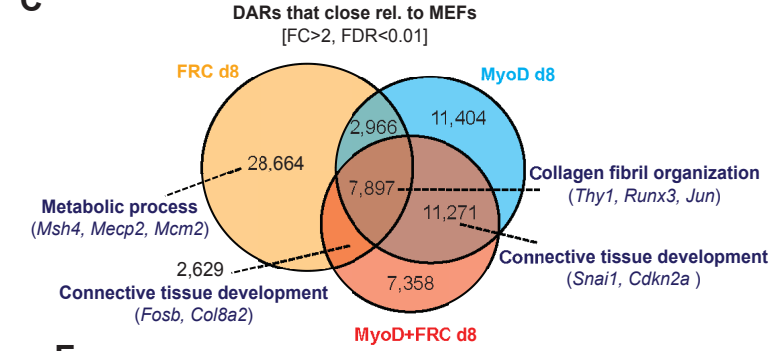

**D**

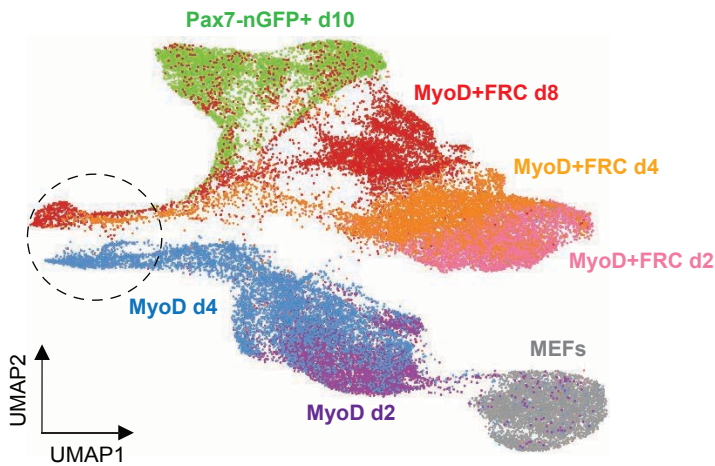

**F**

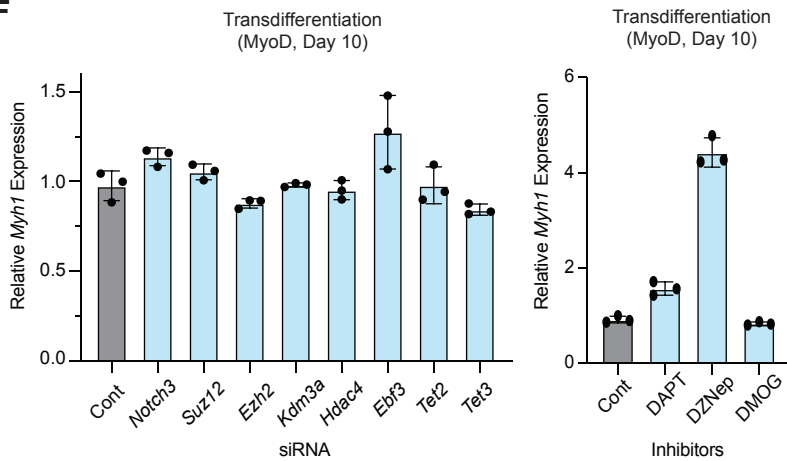

**G**

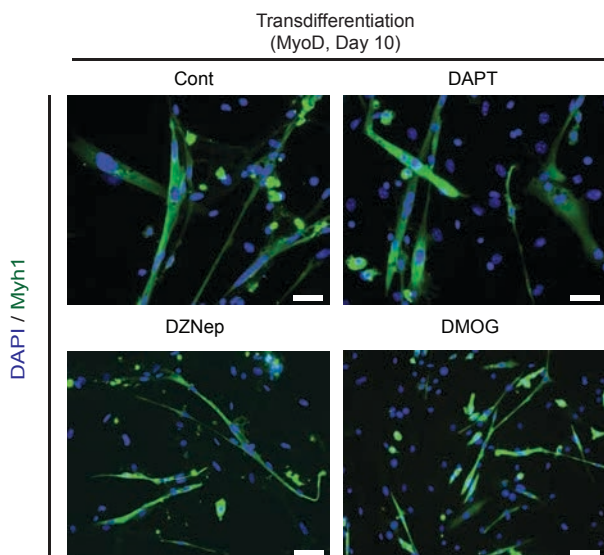

**E**

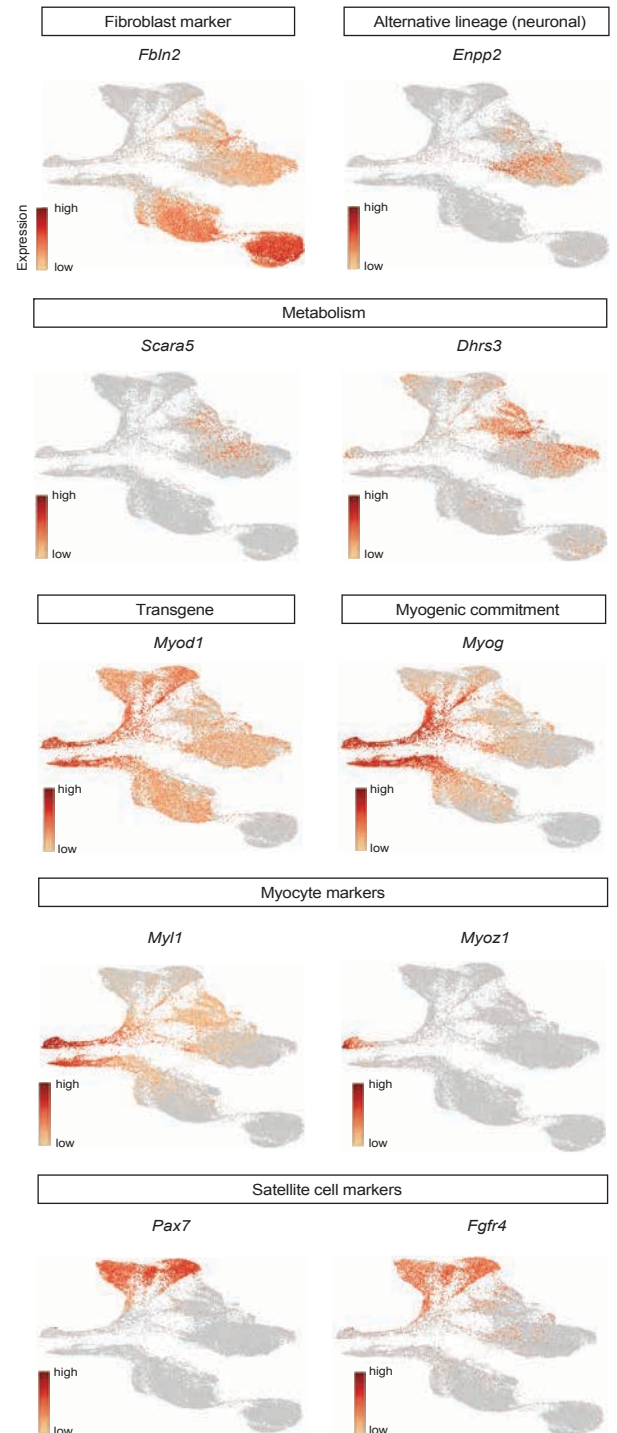

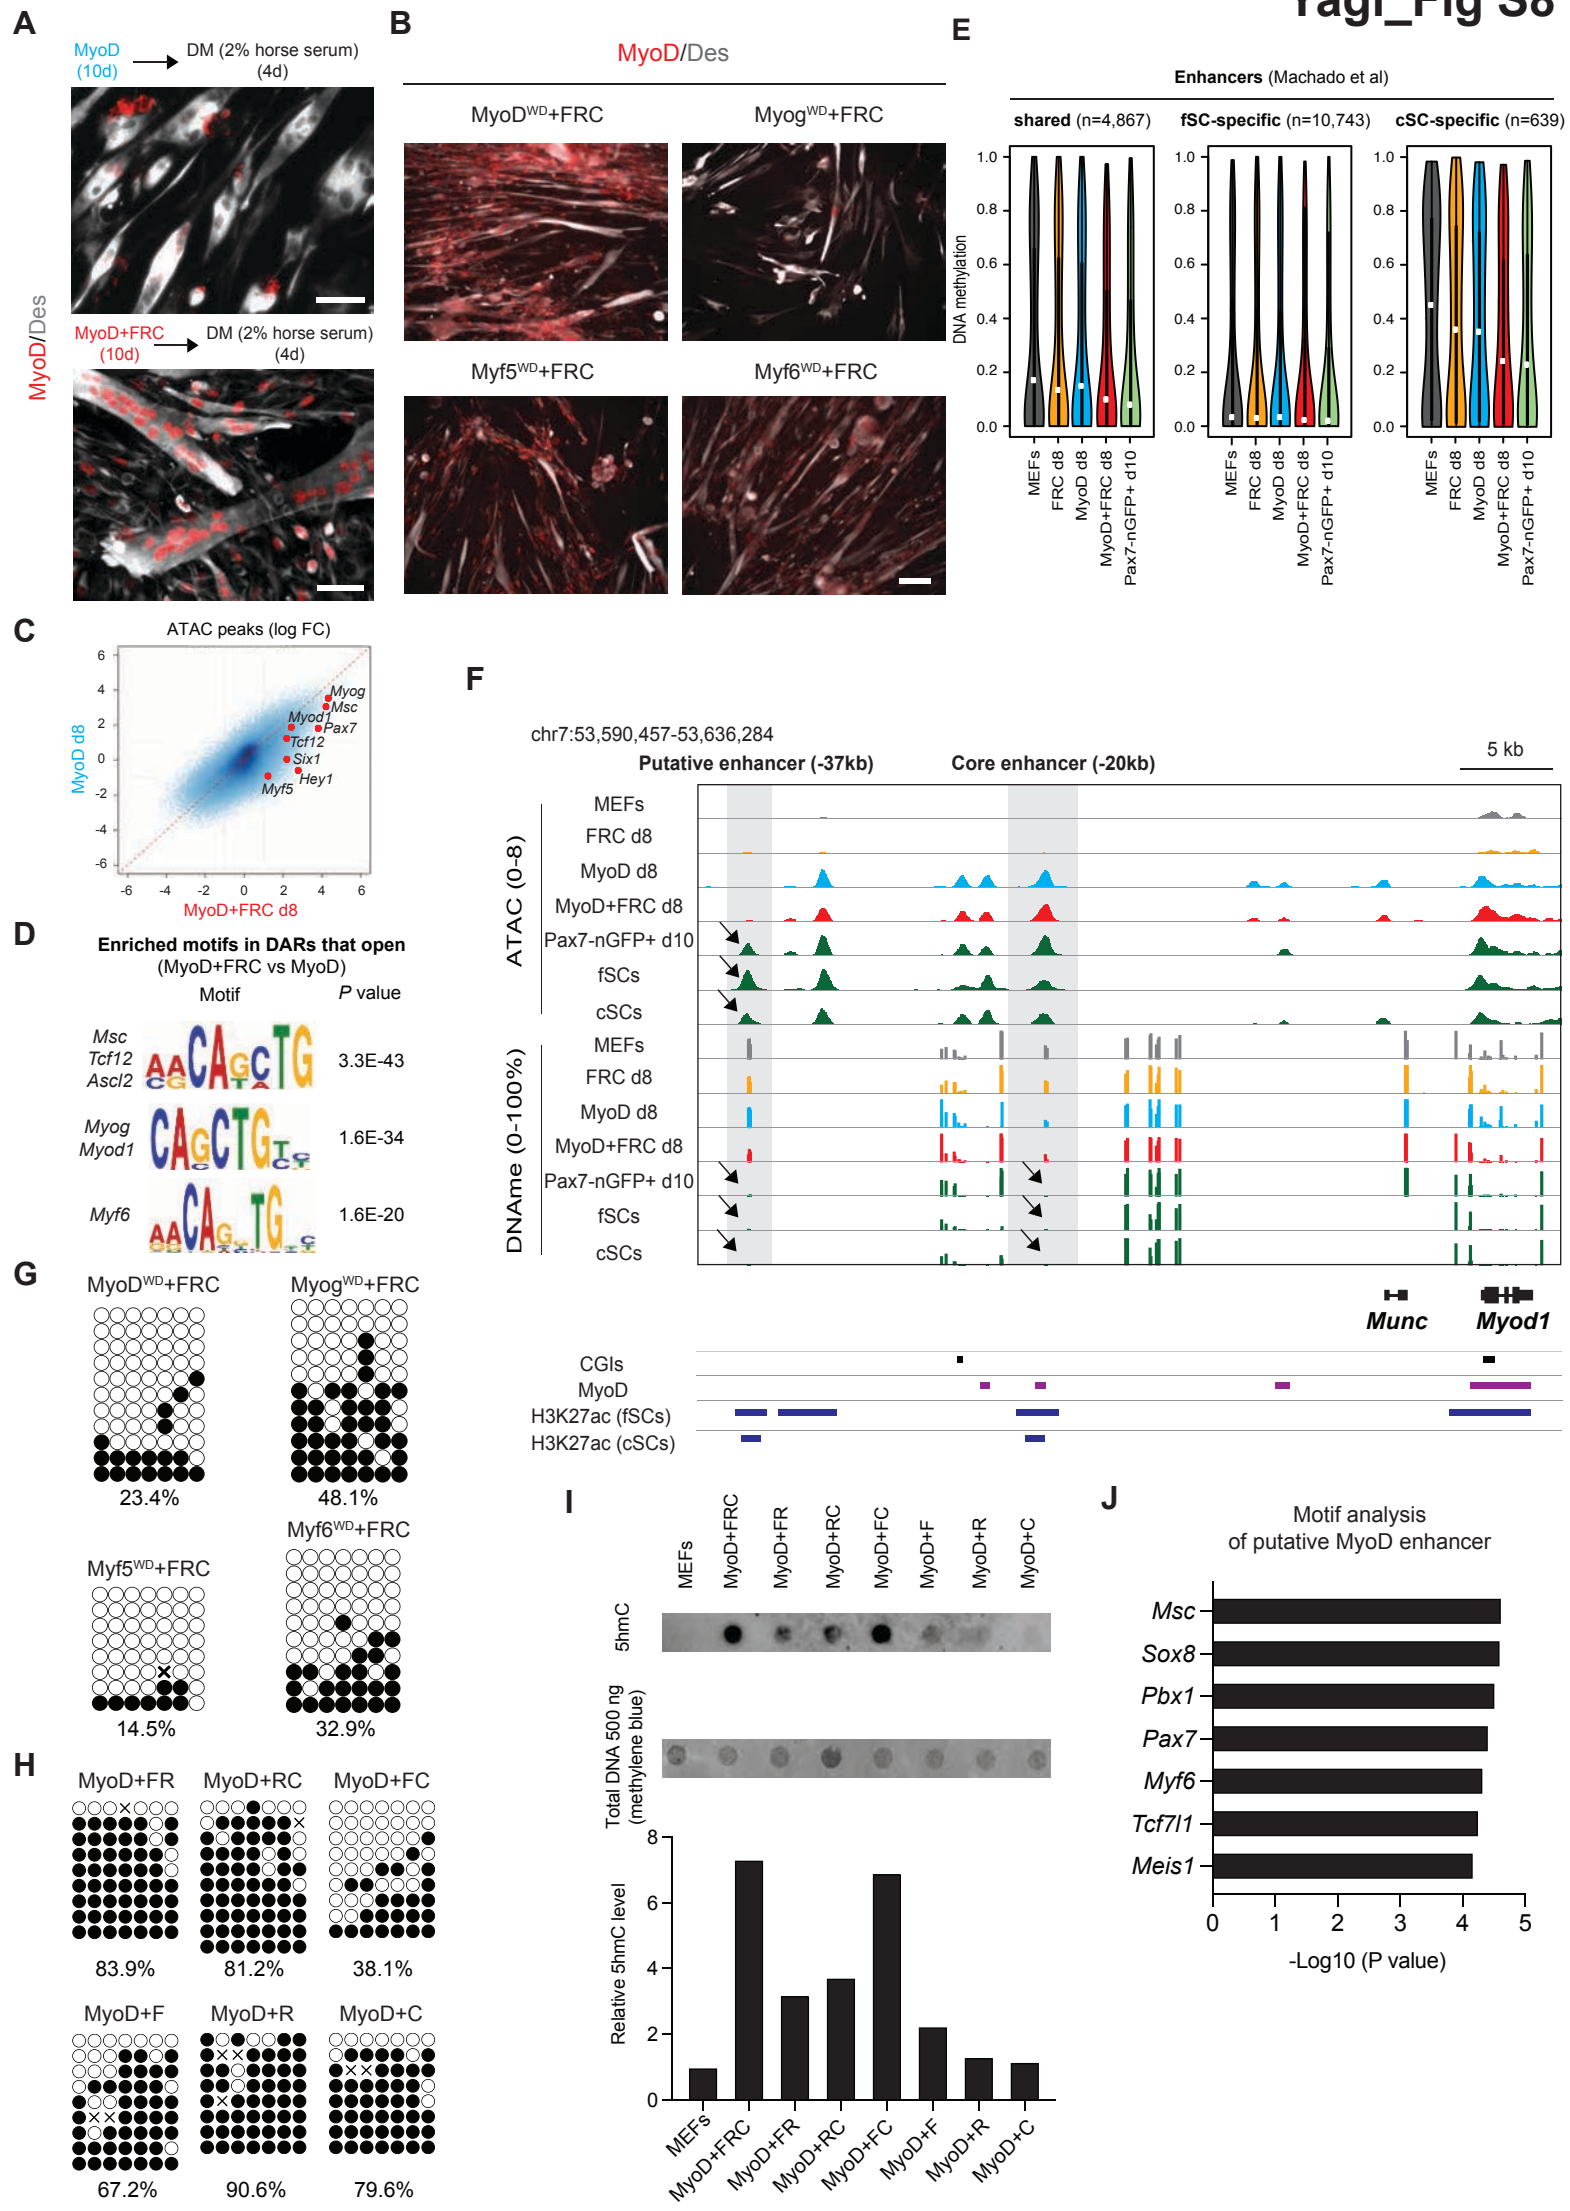



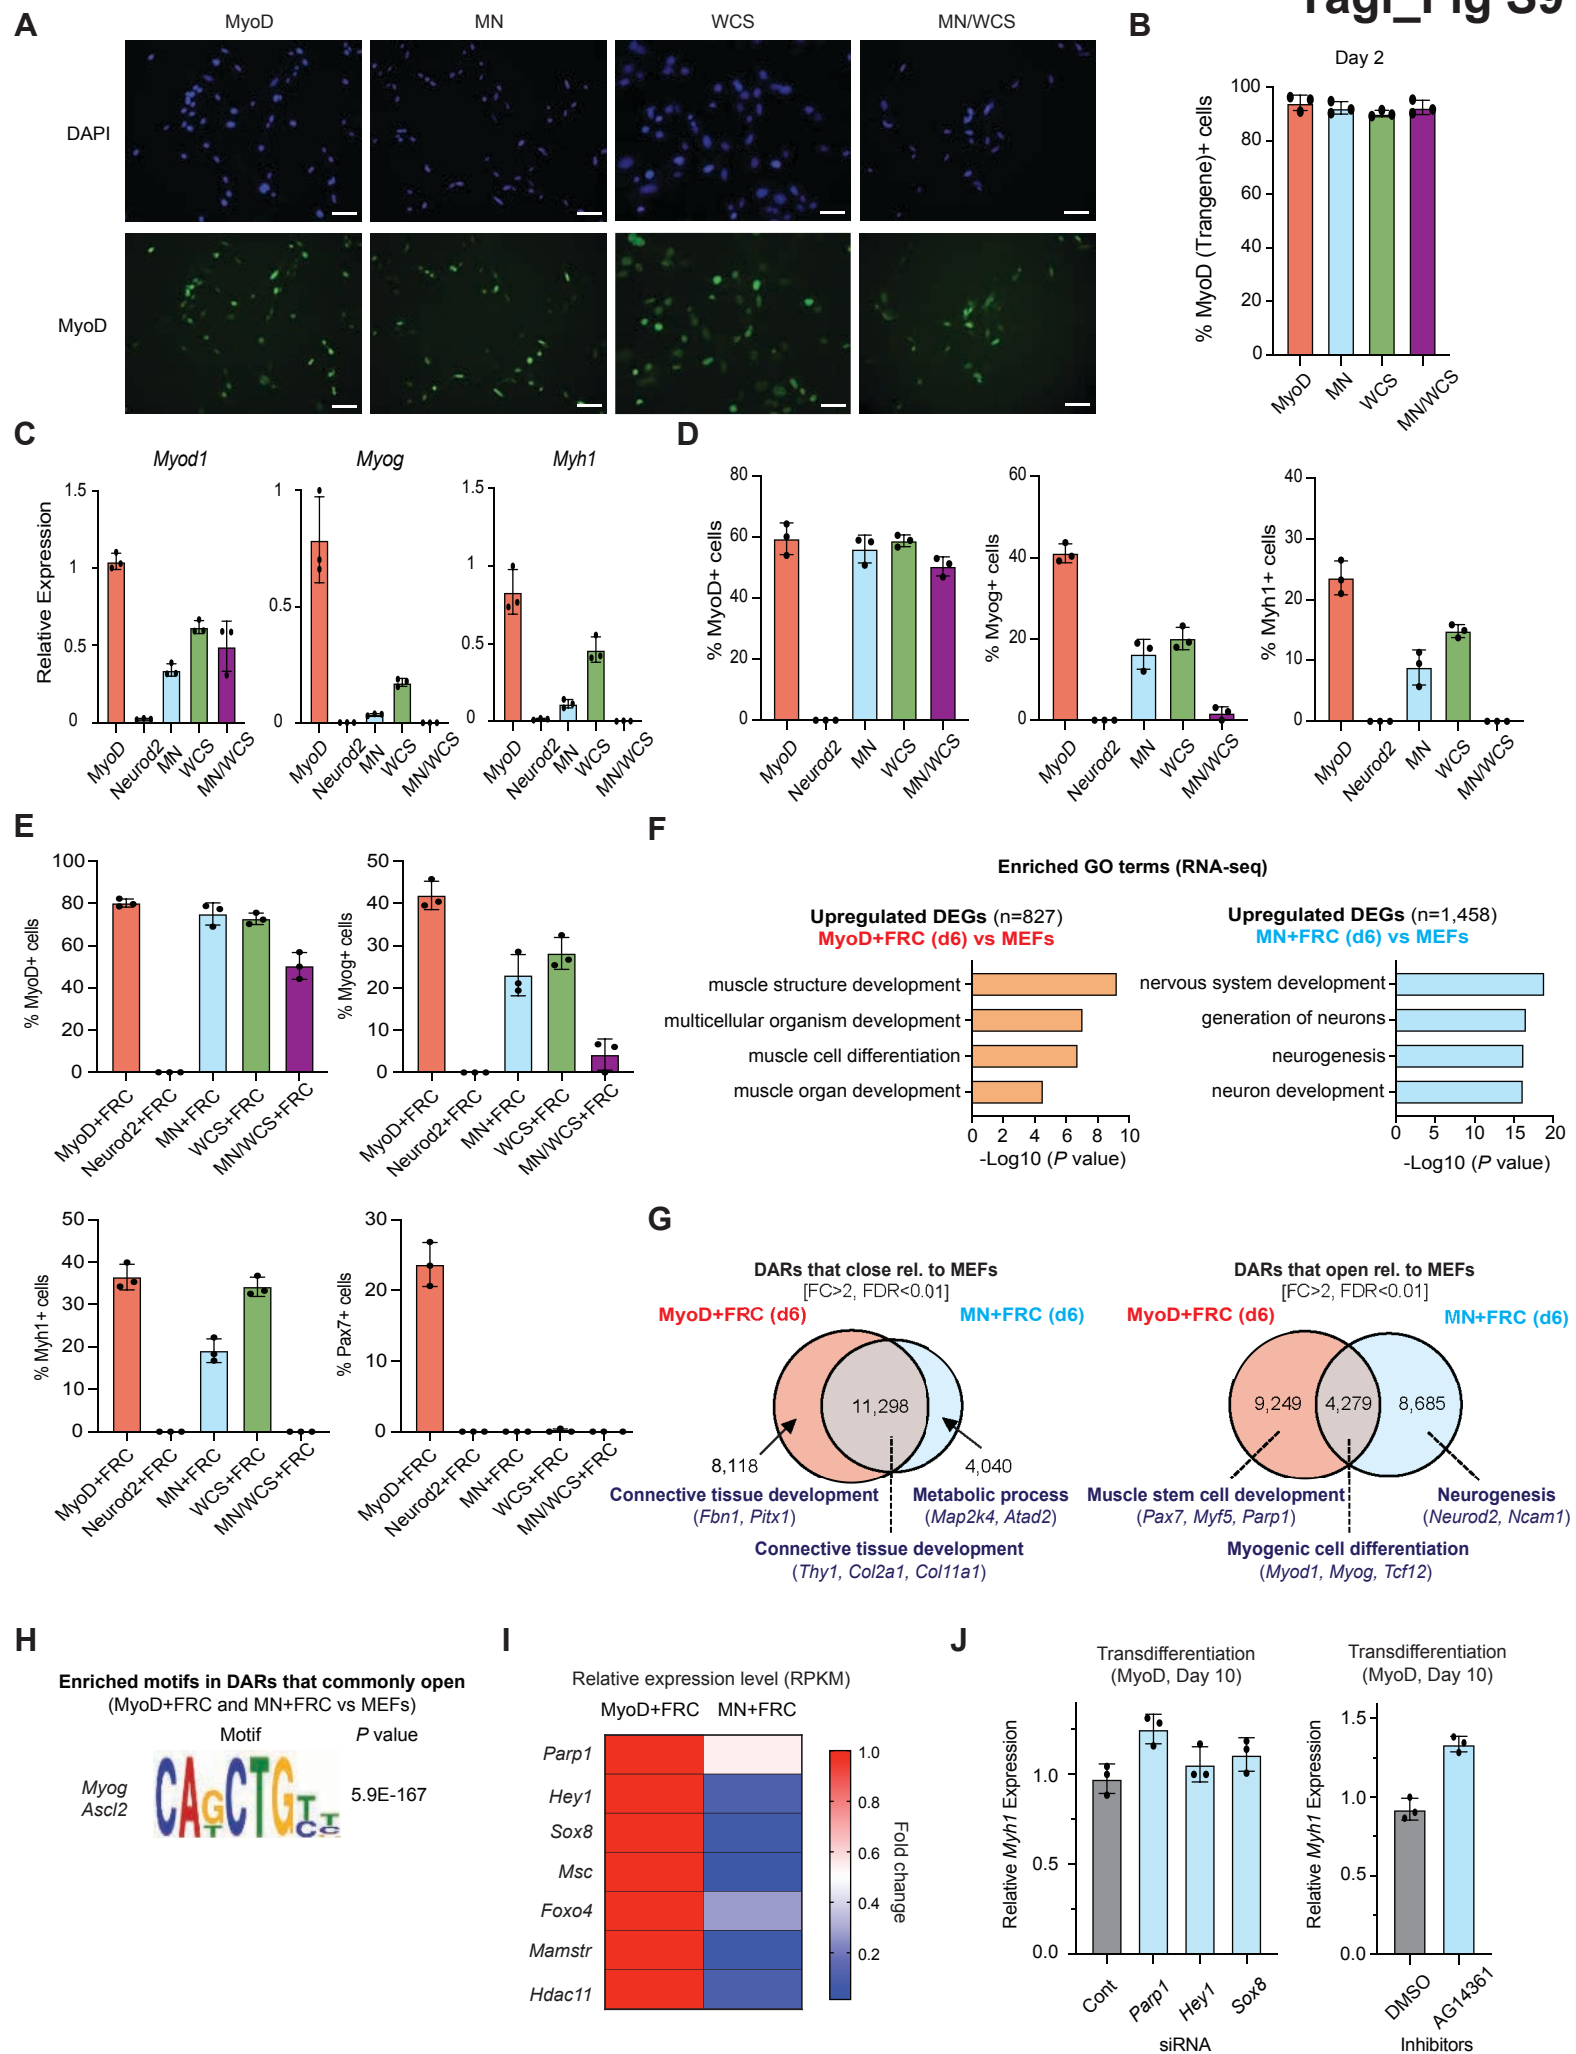

-  Methylated DNA
-  Unmethylated DNA
-  Satellite cell enhancers
-  H3K27me3
-  Common MyoD/Neurod2 targets
-  Unique MyoD targets
-  Transcripts

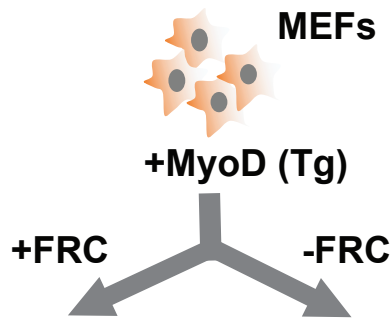

**Dedifferentiation**

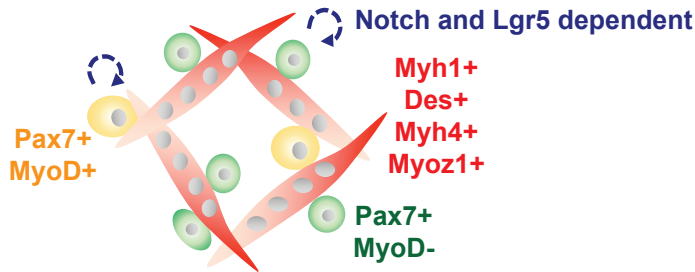

**iMPCs**

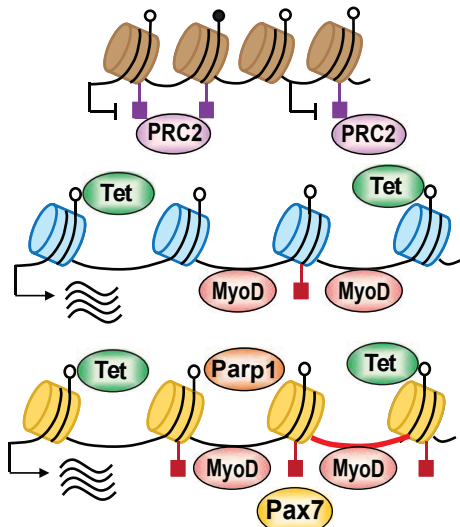

**-MyoD (Tg)**

**Stable**

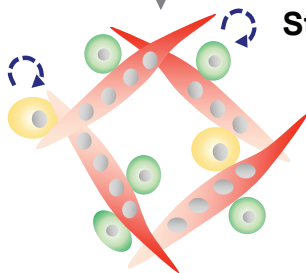

**Transdifferentiation**

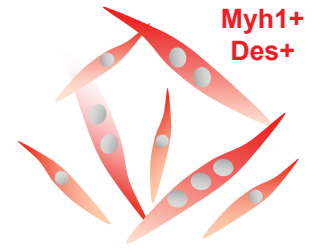

**Myotubes**

**Fibroblast genes**  
(e.g., *Fbln2*, *Thy1*, *Junb*)

**Diff Muscle genes**  
(e.g., *Myod1*, *Myog*, *Des*)

**Muscle stem cell genes**  
(e.g., *Pax7*, *Myf5*, *Msc*)

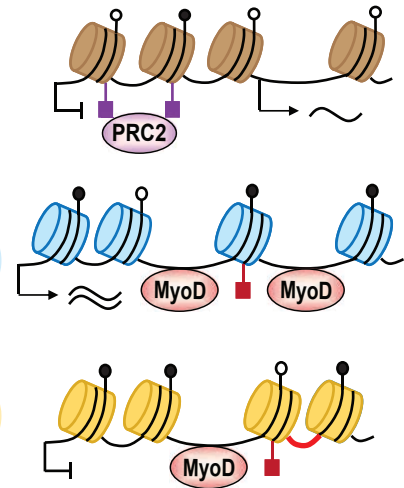

**-MyoD (Tg)**

**Unstable**

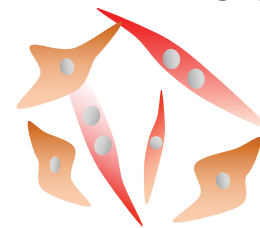

Supplement: supp_gad.348678.121_Supplemental_Figures_S1-S10.pdf [file supp_gad.348678.121_Supplemental_Figures_S1-S10.pdf]
